# Supplementary material for: Assessment of Carbon Substrate Catabolism Pattern and Functional Metabolic Pathway for Microbiota of Limestone Caves
Source: MDPI journal article supplement (doi:10.3390/microorganisms9081789), 2021-08-23
Supplement: s1 [file s1]

Supplementary tables and figures

Supplementary Table S1. Details of sampling environmental conditions

| Sample ID | Sample type | Detection time | Ambient temperature | Humidity | Sunlight (LUX) | Soil temperature | Sampling zone |
|-----------|-------------|----------------|---------------------|----------|----------------|------------------|---------------|
| LR-01     | Rock        | 10:44 AM       | 21.5                | 60 %     | 256-260        | Nil              | Outside cave  |
| LS-01     | Soil        |                |                     |          | 256-261        | 18.5             |               |
| LR-05     | Rock        | 11:55 AM       | 23.3                | 63 %     | 0              | Nil              | Inside cave   |
| LS-05     | Soil        |                |                     |          | 0              | 18.3             |               |

LR-01, LS-01: outside the cave; LR-05, LS-05: inside the cave

**Supplementary Table S2.** Pearson's correlation test against predominant bacteria phylum with environmental factors

|    |                         | Correlations |       |       |       |       |       |       |       |       |         |    |
|----|-------------------------|--------------|-------|-------|-------|-------|-------|-------|-------|-------|---------|----|
|    |                         | 1            | 2     | 3     | 4     | 5     | 6     | 7     | 8     | 9     | 10      | 11 |
| 1  | <b>Planctomycetes</b>   |              |       |       |       |       |       |       |       |       |         |    |
| 2  | <b>Proteobacteria</b>   | 0.86         |       |       |       |       |       |       |       |       |         |    |
| 3  | <b>Acidobacteria</b>    | -0.57        | -0.87 |       |       |       |       |       |       |       |         |    |
| 4  | <b>Actinobacteria</b>   | -0.71        | -0.71 | 0.30  |       |       |       |       |       |       |         |    |
| 5  | <b>Nitrospirae</b>      | 0.07         | -0.03 | 0.46  | -0.68 |       |       |       |       |       |         |    |
| 6  | <b>Chloroflexi</b>      | -0.89        | -0.86 | 0.80  | 0.39  | 0.37  |       |       |       |       |         |    |
| 7  | <b>Gemmatimonadetes</b> | -0.83        | -0.86 | 0.86  | 0.32  | 0.46  | .99** |       |       |       |         |    |
| 8  | <b>Cyanobacteria</b>    | 0.77         | .98*  | -0.95 | -0.58 | -0.19 | -0.85 | -0.88 |       |       |         |    |
| 9  | <b>Temperature</b>      | 0.13         | -0.38 | 0.52  | 0.28  | -0.08 | -0.06 | 0.03  | -0.46 |       |         |    |
| 10 | <b>Humidity</b>         | -0.91        | -0.89 | 0.54  | 0.93  | -0.38 | 0.70  | 0.64  | -0.78 | 0.19  |         |    |
| 11 | <b>Sunlight</b>         | 0.91         | 0.89  | -0.54 | -0.93 | 0.39  | -0.70 | -0.64 | 0.78  | -0.19 | -1.00** |    |

\*. Correlation is significant at the 0.05 level (2-tailed).

\*\*. Correlation is significant at the 0.01 level (2-tailed).

**Supplementary Table S3.** KEGG pathway normalized reads for rock and soil samples collected outside and inside the cave.

| Super pathway               | Sub pathway                                 | LR-01  | LS-01  | LR-05  | LS-05  |
|-----------------------------|---------------------------------------------|--------|--------|--------|--------|
| Carbohydrate metabolism     | Starch and sucrose metabolism               | 0.0051 | 0.0082 | 0.0040 | 0.0062 |
|                             | Galactose metabolism                        | 0.0845 | 0.0731 | 0.0817 | 0.0809 |
|                             | Amino sugar and nucleotide sugar metabolism | 0.0004 | 0.0010 | 0.0004 | 0.0005 |
|                             | Fructose and mannose metabolism             | 0.0003 | 0.0000 | 0.0000 | 0.0000 |
|                             | Pentose phosphate pathway                   | 0.0288 | 0.0162 | 0.0245 | 0.0245 |
|                             | Citrate cycle (TCA cycle)                   | 0.0420 | 0.0746 | 0.0685 | 0.0543 |
|                             | Ascorbate and aldarate metabolism           | 0.0808 | 0.0700 | 0.0802 | 0.0791 |
|                             | Arginine and proline metabolism             | 0.1093 | 0.0798 | 0.1075 | 0.1069 |
| Amino acid metabolism       | Phenylalanine metabolism                    | 0.0006 | 0.0021 | 0.0041 | 0.0014 |
| Other amino acid metabolism | Glycine, serine and threonine metabolism    | 0.0499 | 0.0324 | 0.0368 | 0.0418 |
|                             | Glutathione metabolism                      | 0.0014 | 0.0061 | 0.0045 | 0.0044 |

|                                                  |                                                |        |        |        |        |
|--------------------------------------------------|------------------------------------------------|--------|--------|--------|--------|
| <b>Lipid metabolism</b>                          | <b>Glycerophospholipid metabolism</b>          | 0.0047 | 0.0126 | 0.0037 | 0.0071 |
|                                                  | <b>Bisphenol degradation</b>                   | 0.0382 | 0.0321 | 0.0299 | 0.0359 |
|                                                  | <b>Benzoate degradation</b>                    | 0.0139 | 0.0163 | 0.0134 | 0.0136 |
|                                                  | <b>Photosynthesis - antenna proteins</b>       | 0.0000 | 0.0000 | 0.0001 | 0.0000 |
|                                                  | <b>Carbon fixation pathways in prokaryotes</b> | 0.0027 | 0.0071 | 0.0044 | 0.0035 |
| <b>Xenobiotics biodegradation and metabolism</b> | <b>Methane metabolism</b>                      | 0.0101 | 0.0135 | 0.0092 | 0.0054 |
|                                                  | <b>ABC transporters</b>                        | 0.0319 | 0.0507 | 0.0282 | 0.0216 |
| <hr/>                                            |                                                |        |        |        |        |
|                                                  |                                                |        |        |        |        |

LR-01, LS-01: outside the cave; LR-05, LS-05: inside the cave

**Supplementary Table S4.** Primer information list.

|             |             |                       |
|-------------|-------------|-----------------------|
| Primer type | Primer name | Base pair sequence    |
| Forward     | 341F        | CCTACGGGNGGCWGCAG     |
| Reverse     | 805R        | GACTACHVGGGTATCTAATCC |

**Supplementary Table S5.** Microbial community beta diversity index.

| LR-01                              | LS-01 | LR-05 | LS-05 |
|------------------------------------|-------|-------|-------|
| Microbial community beta diversity |       |       |       |
| D                                  | D     | D     | D     |
| 0.87                               | 0.85  | 0.84  | 0.86  |

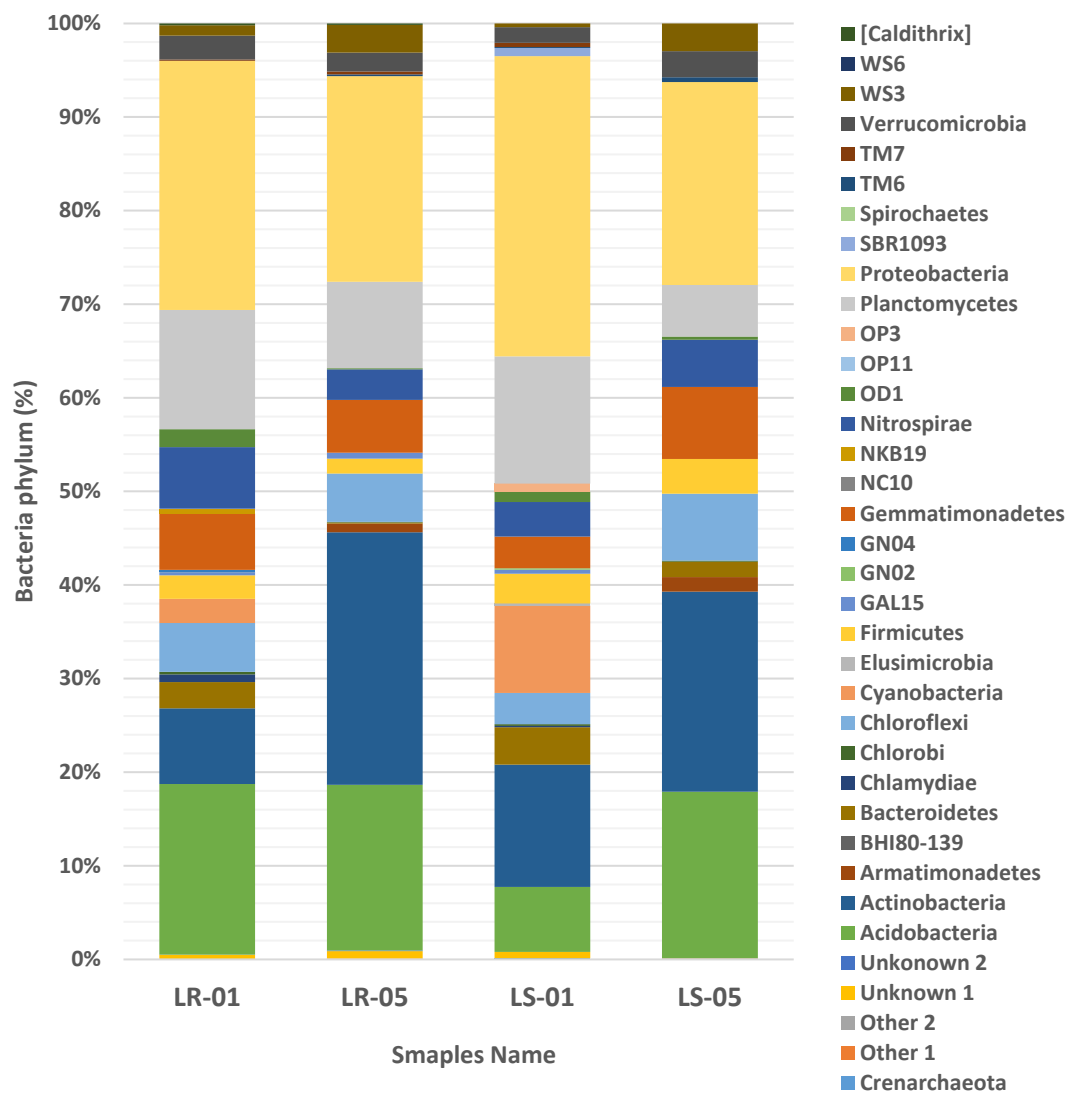

**Supplementary Figure S1.** Abundance of bacteria phylum in all rock and samples

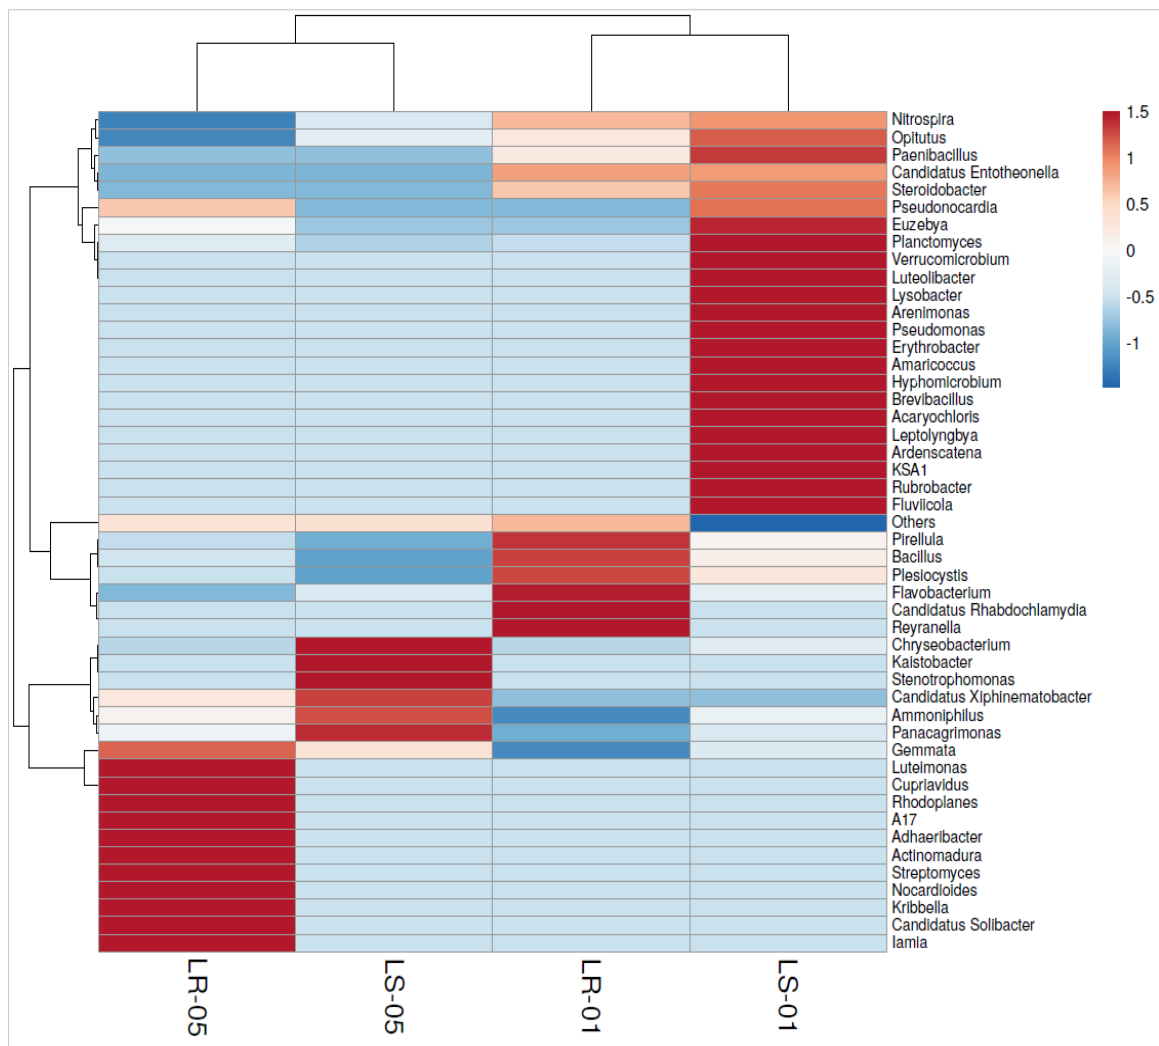

**Supplementary Figure S2.** Heatmap analysis with dendrogram plot at the genus level for all samples
